# Supplementary material
Source: publisher figshare collection journal article supplement (https://asha.figshare.com/articles/dataset/_/6170483)
Supplement: Supplementary file 1 [file 1]

## Supplemental Appendix A

### *Examples of Pre- and Posttreatment Discourse Samples*

Instructions to the participant: "Tell me as much as you can about this picture. You can talk about the picture or anything it reminds you of."

#### **Participant 1**

Pretreatment—picture of woman singing

*"He sim a song and uh . . ."*

Posttreatment—picture of woman singing

*"A woman is singing loud and she's playin' the piano with her lullabies."*

Pretreatment—picture of eating

*"She's uh making a mouth go down."*

Posttreatment—picture of eating

*"A woman is eatin' soup and it tastes like chicken noodle."*

#### **Participant 2**

Pretreatment—picture of woman singing

*"ayedaidu uh XX how are du X book XX daidu XXX I daidu book XX XX XX"*

Posttreatment—picture of woman singing

*"Woman wom woman is X hat X XX is seeding (singing) how ah ah suit ah ah suit XX X XX X suit ah eye ear XX woman hair ah ah hum X X XX X X piano."*

Pretreatment—picture of man fishing

*"wees week X uh show maidy aik X I daido XX XX eat eat XX XX"*

Posttreatment—picture of man fishing

*"Man is fishing ah woman is XX X wahding X XX ah XX X woman is wo woman is X wom woman is book ah had X X XX ah uh hair eye ear eye oh wo woman X XXX ah wam X X wom XX woman (pointing to water)."*

#### **Participant 3**

Pretreatment—picture of man fishing

*"The man says fish . . . fish . . . and the worms worms . . . catch . . . catch"*

Posttreatment—picture of man fishing

*"Me, always (gestures fishing). He's fishing he's catching fish. He's bubble catching round worms . . . rock . . . boots . . . shorts I like thata one but they have a X I can't remember. It's like hmmm. He was shirt and one, two, three (points to 3 pockets). I know but I . . . one, two, three shirts. He's fishing so we ate 'em up. He's gonna more for there's five fishing five fishing house."*

Pretreatment—picture of woman singing

*"Piano . . . laughing . . . I don't know."*

Posttreatment—picture of woman singing

*"She's singing, laughing, piano. Hers people . . . stool, skirt, shoes, pants, a bun, laughing and lalalala."*

#### **Participant 4**

Pretreatment—picture of man digging

*"shovel and and skweat (sweat) and and dat's all"*

Posttreatment—picture of man digging

*"Grandpa bring up the dirt because it's hard."*

Pretreatment—picture of man fishing

*"Wiching and Xproll and caught and worms and and . . ."*

Posttreatment—picture of man fishing

*"uh guy in the fish but in the fish pole"*
