# Supplementary material
Source: publisher figshare collection journal article supplement (https://asha.figshare.com/articles/dataset/_/6170483)

## Supplemental Appendix B

### *Experimental Picture Stimuli*

#### Sets of Items for Participant 1

##### Set 1

dropping  
drinking  
reading  
raking  
drilling  
cooking  
jumping  
waving  
juggling  
ringing

##### Set 2

planting  
eating  
singing  
walking  
ironing  
watching  
shaving  
driving  
catching  
pushing

##### Set 3

climbing  
weaving  
rocking  
bouncing  
mailing  
tickling  
digging  
lighting  
weighing  
knitting

#### Sets of Items for Participants 2, 3, and 4

##### Set 1

combing  
singing  
watching  
walking  
smoking  
shaving  
reading  
fishing  
drawing  
pushing

##### Set 2

cooking  
digging  
knocking  
driving  
riding  
sitting  
eating  
blowing  
painting  
kicking

##### Set 3

cutting  
driving  
dropping  
laughing  
running  
sleeping  
swimming  
waving  
lighting  
crying

#### Example of "dropping"

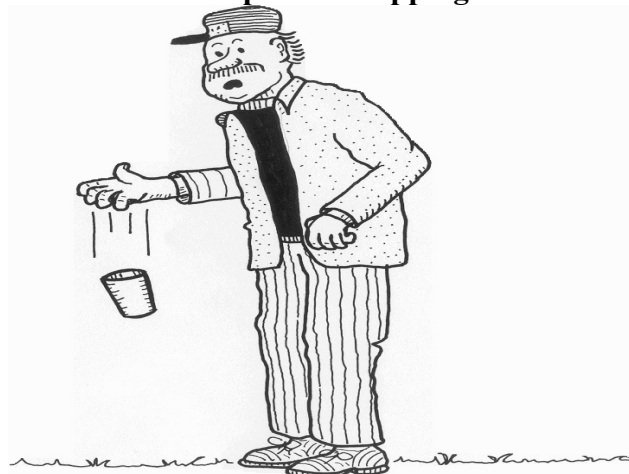

Supplement: Supplementary file 3 [file 1]
