# Supplementary material
Source: publisher figshare collection journal article supplement (https://asha.figshare.com/articles/dataset/_/6170483)
Supplement: Supplementary file 4 [file 1]

## Supplemental Appendix F

### Daily Treatment Administration Log

Subject ID: \_\_\_\_\_

Session Number: \_\_\_\_\_

Date: \_\_\_\_\_

|         | STEP: 1         | 2            | STEP: 3             | 4            | STEP: 5                                                             | Repetitions |   |   | STEP: 6                              |
|---------|-----------------|--------------|---------------------|--------------|---------------------------------------------------------------------|-------------|---|---|--------------------------------------|
| PICTURE | Elicit Response | Model Reinf. | Request Elaboration | Model Reinf. | Model & Request Repetition (if SPT needed go on to following steps) | 1           | 2 | 3 | 5 sec. / Request Elaborated Response |
| 1.      | A. B. C. D.     |              | A. B. C. D.         |              | A. B. C. D.                                                         |             |   |   | A. B. C.                             |
| 2.      | A. B. C. D.     |              | A. B. C. D.         |              | A. B. C. D.                                                         |             |   |   | A. B. C.                             |
| 3.      | A. B. C. D.     |              | A. B. C. D.         |              | A. B. C. D.                                                         |             |   |   | A. B. C.                             |
| 4.      | A. B. C. D.     |              | A. B. C. D.         |              | A. B. C. D.                                                         |             |   |   | A. B. C.                             |
| 5.      | A. B. C. D.     |              | A. B. C. D.         |              | A. B. C. D.                                                         |             |   |   | A. B. C.                             |
| 6.      | A. B. C. D.     |              | A. B. C. D.         |              | A. B. C. D.                                                         |             |   |   | A. B. C.                             |
| 7.      | A. B. C. D.     |              | A. B. C. D.         |              | A. B. C. D.                                                         |             |   |   | A. B. C.                             |
| 8.      | A. B. C. D.     |              | A. B. C. D.         |              | A. B. C. D.                                                         |             |   |   | A. B. C.                             |
| 9.      | A. B. C. D.     |              | A. B. C. D.         |              | A. B. C. D.                                                         |             |   |   | A. B. C.                             |
| 10.     | A. B. C. D.     |              | A. B. C. D.         |              | A. B. C. D.                                                         |             |   |   | A. B. C.                             |

#### Step 1

*Tell me about this picture. What does it remind you of? What's happening?*

- A. if correct, Step 2
- B. model 2 possible responses, request response
- C. model 1 word, request repetition
- D. Integral Stimulation (IS) for noun or verb, up to 4 times

#### Step 2

Repeat production and reinforce.  
Place response in sentence frame.

#### Step 3

Ask question to elicit more information.  
A. if correct, Step 4  
B.–D., same as Step 1

#### Step 4

Repeat and reinforce.  
Place in sentence frame.  
Model combined response.

#### Step 5

Model again & request repetition.  
A. \*If correct (target words & articulation), request 3 repetitions, go to Step 6.  
B. Underline error sounds on frame, model, request repetition, if correct\*  
C. IS up to 3X  
D. Artic. instructions for up to 3 error sounds

#### Step 6

Remove picture and wait 5 seconds  
Return picture & request response  
A. Correct response or correct alternative—reinforce  
B. Partial response, assist with IS  
C. No response, model and request repetition with IS
