# Supplementary material
Source: publisher figshare collection journal article supplement (https://asha.figshare.com/articles/dataset/_/6170483)
Supplement: Supplementary file 5 [file 1]

## Supplemental Appendix E

### *Examples of Elaborated Productions Practiced in Treatment*

#### **Participant 1**

##### ***Beginning of 1st Treatment Phase***

A girl saying goodbye to her mother.

A man is dropping the cup

A man is drilling a hole in a board.

##### ***End of 1st Treatment Phase***

A woman is waving goodbye to her child. She's going to school.

A man is dropping a cup on the ground.

A man is drilling a hole in the wood. He's putting lamps up.

#### **Participant 2**

##### ***Beginning of 1st Treatment Phase***

Woman waving girl

Man hurrying

Lady weeping

##### ***End of 1st Treatment Phase***

Woman waving girl park

Man running bus late

Lady weeping dead cat

#### **Participant 3**

##### ***Beginning of 1st Treatment Phase***

The man walking fast.

Watching TV

Pull up fish

##### ***End of 1st Treatment Phase***

He's walking fast to get the bus.

She's watching a speaker on TV.

He catching a fish with bail.

#### **Participant 4**

##### ***Beginning of 1st Treatment Phase***

Man holding shovel

Guy blowing wind

Woman cooking

##### ***End of 1st Treatment Phase***

The guy is shoveling the dirt to build a fence.

The guy is blowing a dandelion.

The grandma is tasting the food.
