# Supplementary material
Source: publisher figshare collection journal article supplement (https://asha.figshare.com/articles/dataset/_/6170483)
Supplement: Supplementary file 6 [file 1]

# Supplemental Appendix G

*Effect Sizes: d-Index Values for Each Participant Comparing Baseline to Follow-Up*

| Sets               | P1   | P2   | P3    | P4    |
|--------------------|------|------|-------|-------|
| First Treated Set  | 8.89 | 5.41 | 15.52 | 13.64 |
| Second Treated Set | 6.90 | 6.11 | 21.63 | 16.01 |
| Untreated Set      | 4.12 | 3.80 | 5.72  | 5.79  |
