# Supplementary material
Source: publisher figshare collection journal article supplement (https://asha.figshare.com/articles/dataset/_/6170483)
Supplement: Supplementary file 7 [file 1]

## Supplemental Appendix C

### *Sentences Used for Measuring Percentage of Consonants Correct (PCC) and Scoring Examples*

#### **Participant 1**

Sentences for Repetition (auditory only; no printed stimuli)

1. The lady is reading a letter.
2. The man is climbing the large tree.
3. The woman watches basketball.
4. The young girl is jumping the rope.
5. The gentleman is crossing the bridge.
6. The businessman is shaving his beard.
7. The police officer is driving a sportscar.
8. The grandmother is rocking a cradle.
9. The cook is eating fried shrimp.
10. The mother is tickling the baby.

*Total consonants scored: 120*

Sentences for Repetition with Printed Stimuli (auditory + orthographic)

1. The lady is reading a letter that came in the mail.
2. The man is digging a hole to plant the tree.
3. We watched the basketball player juggle the ball.
4. The grandmother is singing a lullaby and rocking the baby to sleep.
5. The woman cooked soup to eat for dinner.
6. The man dropped the beer that he was drinking.
7. The girl pushes the snowball across the street.
8. The man irons his shirt and shaves his face before work.
9. The man turns the headlights on before driving the car at night.
10. He climbed the ladder to rake the leaves out of the gutter.

*Total consonants scored: 186*

#### **Participants 2, 3, and 4**

Sentences for Repetition (auditory only; no printed stimuli)

1. The boy is crying for help.
2. The cook is smoking a turkey.
3. The girl is swimming for fun.
4. The lady is singing a tune.
5. The teen is shaving his face.
6. The boy is riding a bike.
7. The lady is dropping her book.
8. The mother is sleeping late.

9. The lady is knocking hard.
  10. The man is waving his cap.
- Total consonants scored: 87*

#### Sentences for Repetition with Printed Stimuli (auditory + orthographic)

1. The woman is cooking food.
  2. The boy is painting a picture.
  3. The teacher is eating dinner.
  4. The woman is blowing the candle.
  5. The boy is digging a hole.
  6. The woman is fishing for cod.
  7. The girl is drawing a cartoon.
  8. The man is lighting the wood.
  9. The worker is walking home.
  10. The mother is sitting down.
- Total consonants scored: 84*

#### Examples of Errors and Scoring

##### Participant 1

"We wash the basitball player duggle the ball"

+ + 0 0 + + 0 + + + + 0 + + + +

We watched the basketball pl a y e r iu gg l e the ba l l. 14/18 (possible)

##### Participant 2

"Coy ee yaiyee bite"

0 0 0 0 + 0

The boy is r i d i ng a b i k e. 1/6 (possible)

##### Participant 3

"cook turkey"

+ + 0 0 0 0 + + +

The coo k is s mo k i ng a tu r k ey. 5/9 (possible)

##### Participant 4

"The lady is ringing the tune"

+ + 0 + + + +

The la dy is s i ng i ng a tu n e. 6/7 (possible)

*Note.* Participant productions are shown in quotes. The sentence scoring template is shown with target consonants underlined. Productions are marked +/0 for accuracy, and the total number of correctly produced consonants is tallied. Total possible is shown in parentheses.
