# Supplementary material
Source: publisher figshare collection journal article supplement (https://asha.figshare.com/articles/dataset/_/6170483)
Supplement: Supplementary file 8 [file 1]

## Supplemental Appendix H

### *Pre- and Posttreatment Measures: Single Word Intelligibility and Production of Correct Information Units (CIUs) in Discourse*

| Measure                                                                                           | Participant 1 |      | Participant 2 |      | Participant 3 |      | Participant 4 |      |
|---------------------------------------------------------------------------------------------------|---------------|------|---------------|------|---------------|------|---------------|------|
|                                                                                                   | Pre           | Post | Pre           | Post | Pre           | Post | Pre           | Post |
| <i>Assessment of Intelligibility of Dysarthric Speech</i> (word level—orthographic transcription) | 76%           | 72%  | 8%            | 10%  | 76%           | 88%  | 64%           | 66%  |
| <i>Nicholas &amp; Brookshire (1993)</i>                                                           |               |      |               |      |               |      |               |      |
| Total Number CIUs                                                                                 | 279           | 104  | 12            | 22   | 129           | 260  | 54            | 36   |
